# Supplementary material
Source: PubMed Central journal article supplement (PMC8403015)

1 **Online Repository, Legends and Table**2 **Figure E1. Symptoms and use of acid suppression in infants with FPIAP vs. unaffected**3 **infants.** Parent-reported symptoms and use of acid suppressing medications in infants with4 FPIAP (n=153) compared to unaffected infants (n=750), \* denotes  $P < .05$  \*\*\* denotes  $P < .001$ 5 **Table E1. Symptoms and use of acid suppression in infants with FPIAP vs. unaffected**6 **infants using *a priori* case inclusion criteria vs. a post hoc stricter definition.** Significantly7 different parent-reported symptoms as shown in Figure E1, comparing the *a priori* case inclusion

8 criteria (FPIAP cases n=153) with a more stringent post hoc definition of FPIAP requiring

9 documentation of gross blood or mucous in the stool (FPIAP cases n=119).

| <b>Using <i>a priori</i> case inclusion criteria for FPIAP</b>         |                               |                        |                  |
|------------------------------------------------------------------------|-------------------------------|------------------------|------------------|
|                                                                        | Unaffected infants<br>(n=750) | FPIAP cases<br>(n=153) | p-value          |
| <b>Irritability</b>                                                    | 41%                           | 73%                    | <b>&lt;0.001</b> |
| <b>Gagging</b>                                                         | 40%                           | 51%                    | <b>0.024</b>     |
| <b>Food Refusal</b>                                                    | 13%                           | 28%                    | <b>&lt;0.001</b> |
| <b>H2 use</b>                                                          | 10%                           | 34%                    | <b>&lt;0.001</b> |
| <b>PPI use</b>                                                         | 3%                            | 17%                    | <b>&lt;0.001</b> |
| <b>Using stricter post hoc FPIAP case inclusion criteria for FPIAP</b> |                               |                        |                  |
|                                                                        | Unaffected infants<br>(n=784) | FPIAP cases<br>(n=119) | p-value          |
| <b>Irritability</b>                                                    | 43%                           | 70%                    | <b>&lt;0.001</b> |
| <b>Gagging</b>                                                         | 40%                           | 53%                    | <b>0.012</b>     |
| <b>Food Refusal</b>                                                    | 14%                           | 29%                    | <b>&lt;0.001</b> |
| <b>H2 use</b>                                                          | 11%                           | 32%                    | <b>&lt;0.001</b> |
| <b>PPI use</b>                                                         | 4%                            | 17%                    | <b>&lt;0.001</b> |

10

11 FPIAP: Food protein-induced allergic proctocolitis; H2: Histamine H2-receptor antagonists; PPI: Proton-pump inhibitor

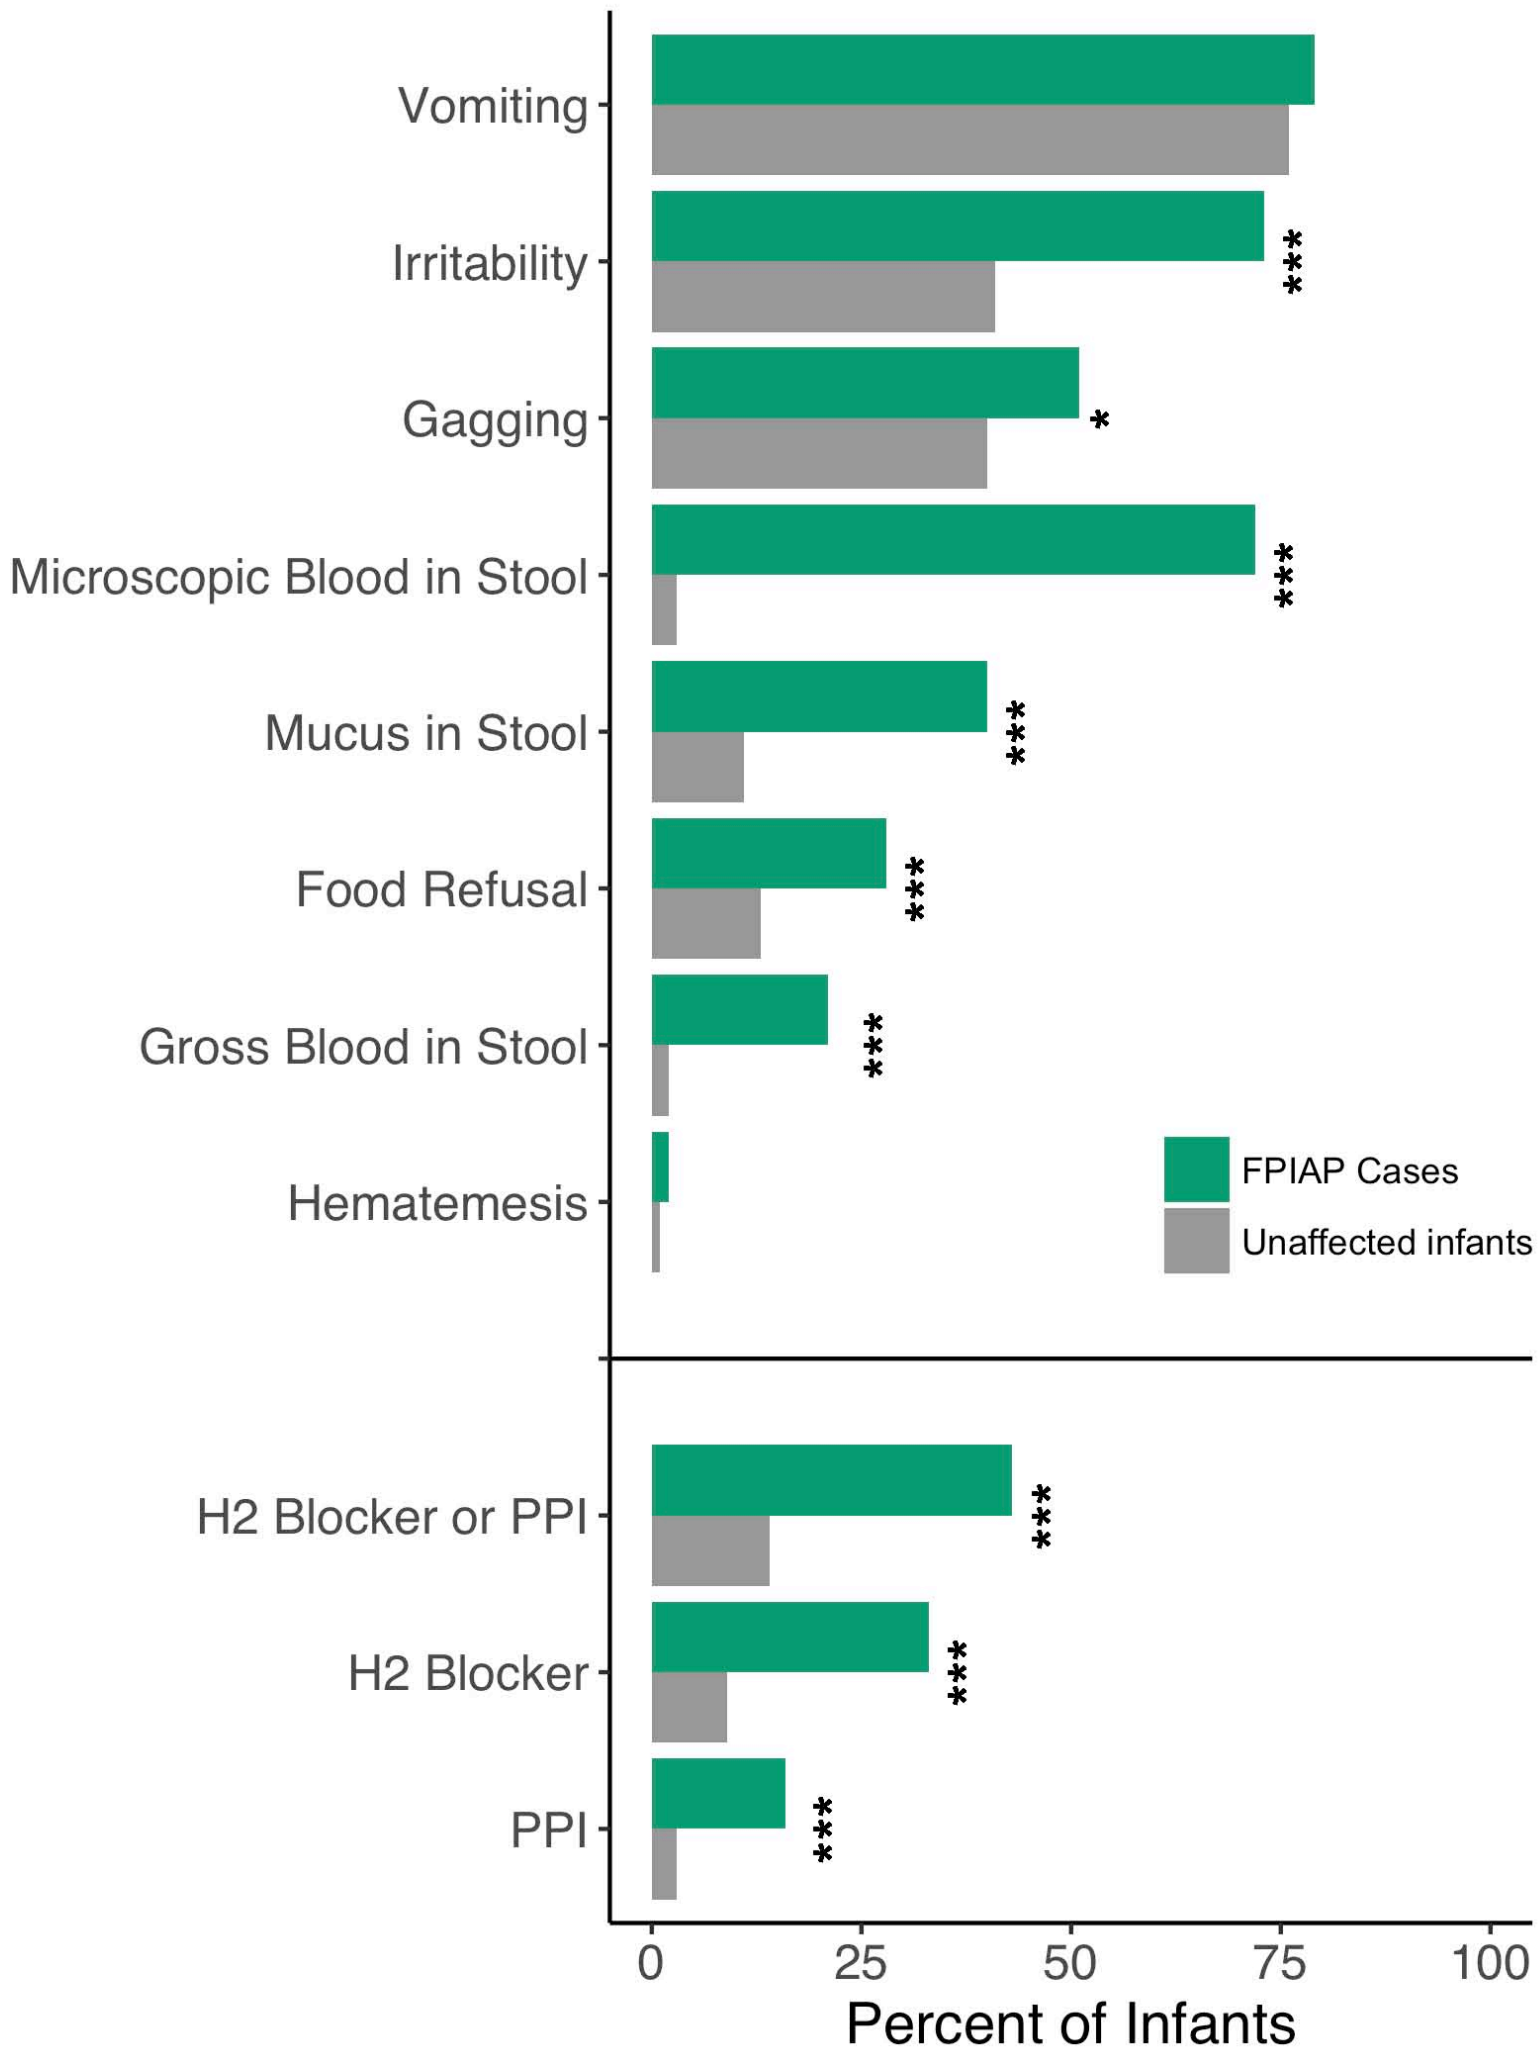

Supplement: NIHMS1617329-supplement-1.pdf [file NIHMS1617329-supplement-1.pdf]
